# Supplementary material for: Distinct functions of cardiac β-adrenergic receptors in the T-tubule vs. outer surface membrane
Source: eLife journal article supplement (doi:10.7554/elife.84243), 2025-09-18
Supplement: supp [file 201218_Analyses.xlsx]

## Sheet: Noyau
C
pPKA substrate	Noyau		CTRL WT 15/12 rat 1	Iso 10nM 15/12 rat 1	PEGiso 1 uM 15/12 rat 1	CTRL 15/12 rat 2	Iso 10nM 15/12 rat 2	PEGiso 1 uM 15/12 rat 2	CTRL WT 12/08	Iso 10nM 12/08	PEGiso 1 uM 12/08
			376.021	5659.47	3164.68	158.071	5243.05	2928.68	105.485	1878.43	295.021
				2268.56	820.728	687.314	2283.26	824.435	67.778	135.021	191.263
				654.971	77.314	61.364	1580.51	331.728	54.95	103.192
						28.657			89.364
			376.021	2861	1354.24	233.852	3035.61	1361.61	79.3942	705.549	243.142
Total proteins			CTRL WT 15/12 rat 1	Iso 10nM 15/12 rat 1	PEGiso 1 uM 15/12 rat 1	CTRL 15/12 rat 2	Iso 10nM 15/12 rat 2	PEGiso 1 uM 15/12 rat 2	CTRL WT 12/08	Iso 10nM 12/08	PEGiso 1 uM 12/08
			2109.11	2709.11	1637.63	2305.36	2700.23	1698.75	1608.16	1323.16	842.941
			207.435	80.849	2881.67	3056.09	3369.45	2765.74	897.326	1243.15	1741.74
			3331.7	962.376	729.113	769.184	567.749	517.941	1371.08	82.314	294.698
			1506.28	429.698	194.385	1109.2	1203.84	907.891	646.062	721.598	1302.5
			1750.84	286.142	175.556	3808.37	2819.22	2554.47	2295.64	436.991	3249.42
			5593	1151.18	1867.47	3968.68	2570.88	3753.64	4966.4	3481.83
			6201.88	668.648	3341.45					4967.35
				3468.35
				5212.4
			20700.3	14968.8	10827.3	15016.9	13231.4	12198.4	11784.7	12256.4	7431.3
		Ratio	0.018165	0.191131	0.125077	0.0155726	0.229425	0.111622	0.00673708	0.0575658	0.0327186
		% increase		10.5219	6.88558		14.7326	7.16786		8.54462	4.8565
		Mean		Iso	PEG-Iso
				11.2664	6.30331
		SEM		1.82469	0.727981
		All divided by 1000		0.0112664	0.00630331
				0.00182469	0.000727981
		Mean controls	0.0134916

## Sheet: Cytosol
pPKA substrat	Cytosol		CTRL WT 15/12 rat 1	Iso 10nM 15/12 rat 1	PEGiso 1 uM 15/12 rat 1	CTRL 15/12 rat 2	Iso 10nM 15/12 rat 2	PEGiso 1 uM 15/12 rat 2	CTRL WT 12/08	Iso 10nM 12/08	PEGiso 1 uM 12/08
			64.071	21.243	2336.05	19.95	44.364	36.657	386.071	112.364	113.364
			2938.3	3453.61	81.364	379.092	3039.02	290.192	55.657	262.485	67.071
			68.485	217.071	70.192	83.192	167.071	533.971	25.657	44.657	42.95
			31.364	191.728		1145.51	72.364	1996.36	92.607	153.192	92.607
						122.778	477.142	202.778	141.435	66.485	43.364
								96.364	88.778	27.536	644.506
								133.899	315.849	49.364
			775.554	970.913	829.203	350.104	759.993	470.031	158.008	102.298	167.31
Bleu prot totales			139.192	663.598	45.364	306.042	127.728	860.569	1044.06	362.142	107.607
			74.657	75.314	67.071	64.314	79.485	38.778	221.849	75.485	1202.15
			411.77	1047.03	53.071	2690.95	93.142	3395.18	1163.77	63.071	472.92
			886.556	297.142	149.335	58.364	793.92	2925.59	293.435	61.364	141.728
			242.314	226.506	2752.63	411.577	739.477	111.849	401.627	121.021	448.234
			1100.36	68.778		2752.05	1143.05	93.485	523.477	1719.92	660.042
			282.678	319.284	280.042	105.142	371.335	470.477	1471.58	458.627	1691.7
			580.698	2738.71	3309.02	178.142	2482.05		3000.11	1478.41	413.335
			1655.23	72.192	88.314	559.284	137.142		1078.58	289.627	417.456
			1616.18	703.355	140.556	74.314	71.071		701.163	81.071	99.314
			112.607	340.799	310.385		273.092		277.849	327.87	1037.56
			253.556	133.435	96.314		69.607		105.021	594.255
			479.991						102.435
			298.385						49.607
		Moyenne	581.013	557.179	662.919	720.018	531.759	1127.99	745.326	469.405	608.368
		Ratio phPKA/Prot tot	1.33483	1.74255	1.25084	0.486243	1.42921	0.416698	0.211998	0.21793	0.275015
			4053.68	1301.13	2040.15	920.941	895.012	1344.74	6308.99	5576.85	10798
				989.406	431.749	83.364	97.778	418.87	2022.03	642.82	3078.69
						513.749	296.678
			4053.68	1145.27	1235.95	506.018	429.823	881.805	4165.51	3109.84	6938.34
		ration 2	0.191321	0.847759	0.670903	0.69188	1.76815	0.533033	0.0379323	0.0328948	0.0241139
